# Supplementary material for: Immunoscore Combining CD8, FoxP3, and CD68-Positive Cells Density and Distribution Predicts the Prognosis of Head and Neck Cancer Patients
Source: MDPI journal article supplement (doi:10.3390/cells11132050), 2022-06-28
Supplement: s1 [file s1]

**Table S1.** Description of immunostaining experimental condition.

| Immunostaining | CD8                                                         | FoxP3           | CD68                                                        |
|----------------|-------------------------------------------------------------|-----------------|-------------------------------------------------------------|
|                | <i>Antigen retrieval</i>                                    |                 |                                                             |
| Buffers        | EDTA 10%                                                    | Citrate 10%     | EDTA 10%                                                    |
| Conditions     | MP 6min                                                     | MW 21min        | MP 6min                                                     |
| <i>Blocage</i> | Caseine 0,5% 15min                                          | CSAII Kit, Dako | Caseine 0,5% 15min                                          |
|                | <i>Primary Ab</i>                                           |                 |                                                             |
| Speces         | Mouse                                                       | Mouse           | Mouse                                                       |
| Manufacturer   | Dako                                                        | Invitrogen      | Dako                                                        |
| Dilution       | 1/200                                                       | 1/200           | 1/200                                                       |
| Timing         | 1h RT                                                       | 1h RT           | 1h RT                                                       |
|                | <i>Secondary Ab</i>                                         |                 |                                                             |
| References     | BrightVision+<br>Poly- HRP-Anti<br>Mouse/Rabbit<br>IgG, VWR | CSAII Kit, Dako | BrightVision+<br>Poly- HRP-Anti<br>Mouse/Rabbit<br>IgG, VWR |

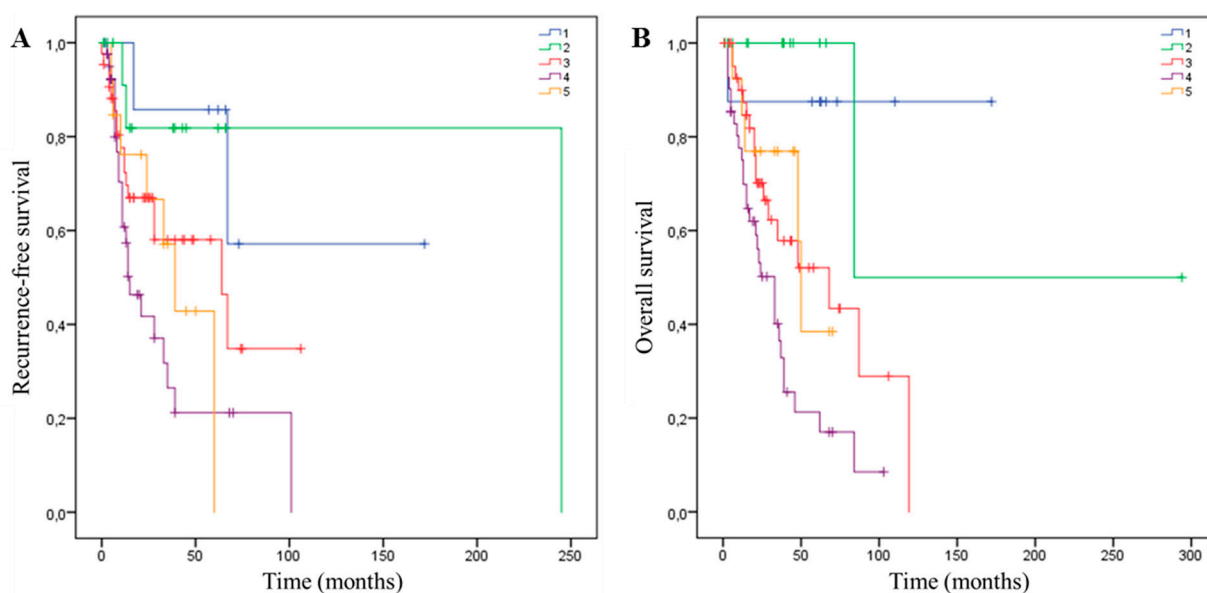

**Figure S1.** Immunoscore included CD8 ST/IT, FoxP3 ST/IT and CD68 IT. (A) Kaplan Meier curves comparing recurrence-free survival (RFS) and (B) overall survival (OS) of our scoring system (range 1 to 5).

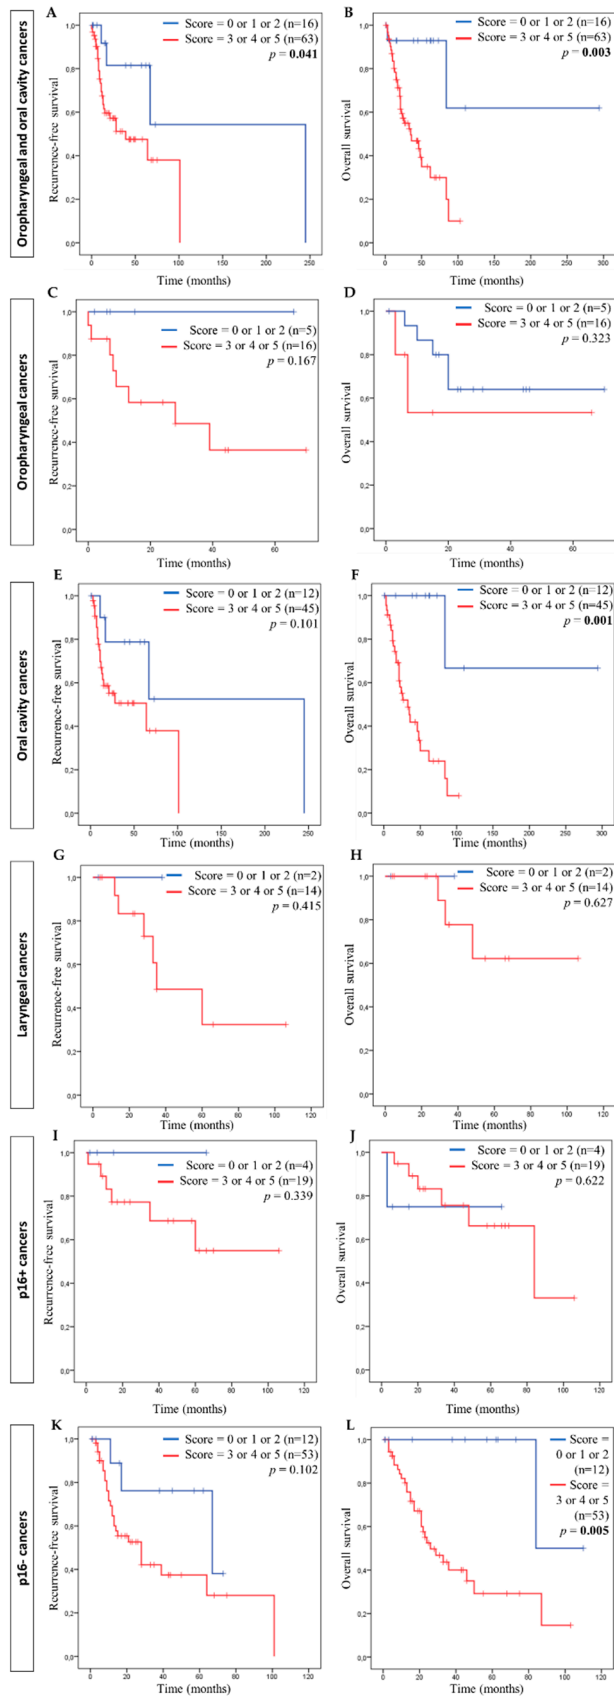

**Figure S2.** Immunoscore included CD8 ST/IT, FoxP3 ST/IT and CD68 IT. Kaplan Meier curves comparing recurrence-free survival (RFS) and overall survival (OS) of our scoring system (range 1 to 5) in oropharyngeal and oral cavity cancers (A-B), in oropharyngeal cancers (C-D), in oral cavity cancers (E-F), in laryngeal cancers (G-H), in p16+ HNSCC (I-J), p16- HNSCC (K-L).
